# Supplementary material for: Sleep increases chromosome dynamics to enable reduction of accumulating DNA damage in single neurons
Source: PubMed Central journal article supplement (PMC6401120; doi:10.1038/s41467-019-08806-w), 2019-03-05
Supplement: 41467_2019_8806_MOESM1_ESM.pdf [file 41467_2019_8806_MOESM1_ESM.pdf]

Supplementary Information

**Sleep increases chromosome dynamics to enable reduction of accumulating DNA  
damage in single neurons**

Zada et al.

## Supplementary Figure 1

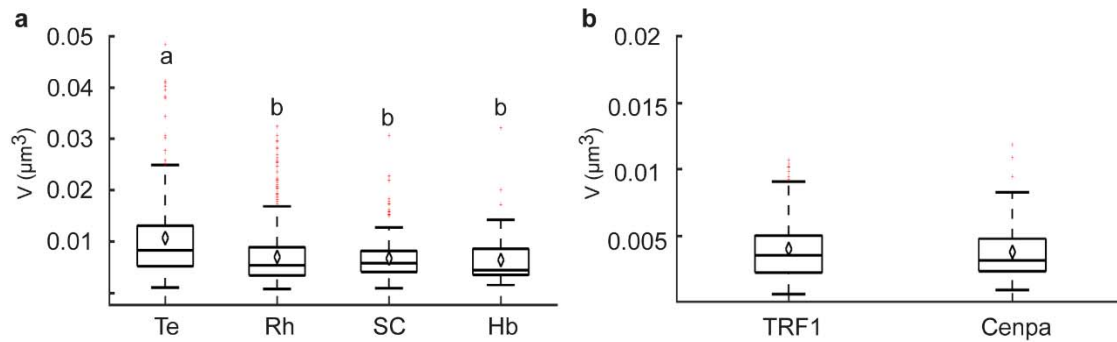

**Chromosome dynamics in different brain regions.** (a) Chromosome dynamics over 9.5 minutes in different CNS regions. Telencephalon (Te,  $n=340$  chromosomes), rhombencephalon (Rh,  $n=475$  chromosomes), spinal cord (SC,  $n=176$  chromosomes), and habenula (Hb,  $n=95$  chromosomes).  $P=1.1 \times 10^{-16}$ ,  $F=29.65$ , degrees of freedom=3, determined by one-way ANOVA followed by a Tukey test. Letters indicate significant changes. (b) Telomere (TRF1,  $n=134$  telomeres) and centromere (Cenpa,  $n=104$  centromeres) dynamics over 9.5 minutes in SC neurons.  $P=0.46$  determined by two-tailed  $t$ -test: two samples assuming unequal variance. Red crosses indicate outliers. Values are presented as boxplots and means (black diamonds). Boxplots indicate the median and the 25<sup>th</sup>-to-75<sup>th</sup> percentiles. The whiskers extend to the most extreme data points.

## Supplementary Figure 2

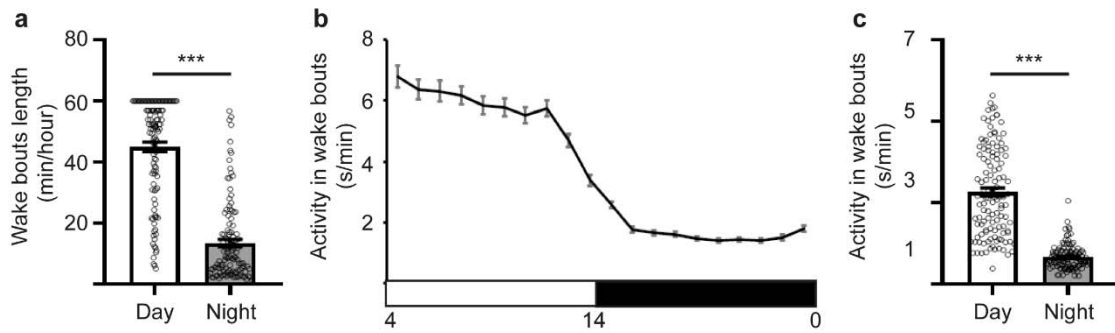

**Reduced time of activity during wake bouts that occur during the night. (a)** Average wake-bout length during day and night.  $***P=2.8\times 10^{-39}$ . **(b)** Time of activity during wake bouts in 6 dpf larvae ( $n=119$  larvae). White and dark bars represent day and night, respectively **(c)**. Average time of activity during wake bouts.  $***P=1.2\times 10^{-31}$ . Determined by two-tailed  $t$ -test: two samples assuming unequal variance. Values are presented as dot plots and means  $\pm$  SEM.

### Supplementary Figure 3

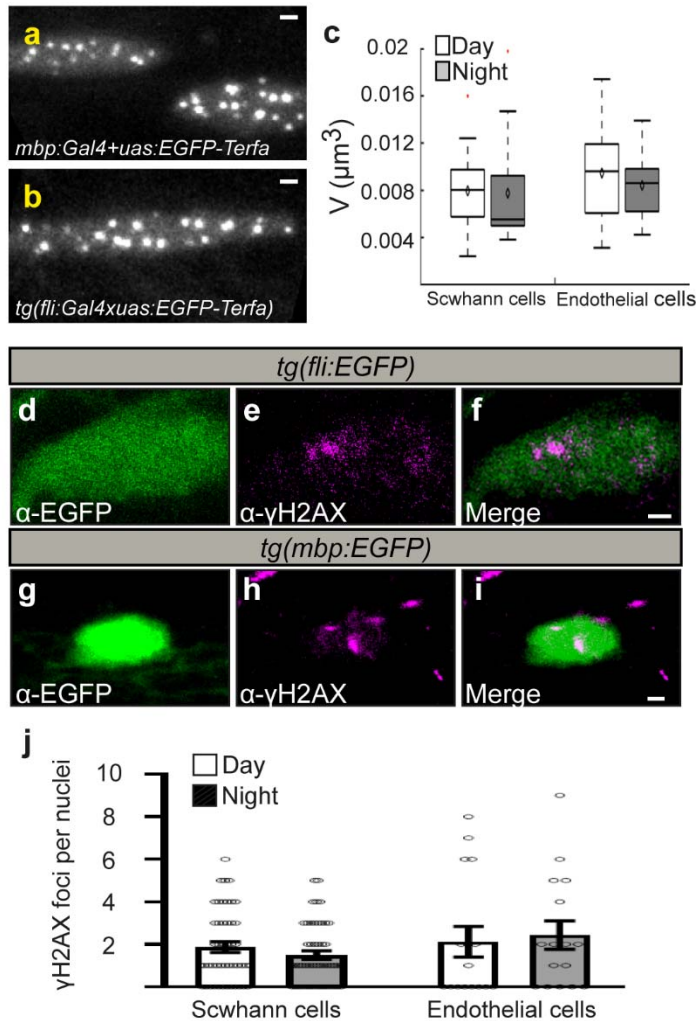

**Chromosome dynamics and DSB levels are similar during day and night in Schwann and endothelial cells.** Live 3D imaging of chromosome dynamics in the nucleus of Schwann cells (a) and endothelial cells (b) located in the trunk of 6 dpf larvae. (c) Boxplots and means (black diamonds) of the volume of chromosome dynamics over 9.5 min per cell. Schwann cells: Day (n=19 cells) and night (n=17 cells). Endothelial cells: Day (n=25 cells) and night (n=23 cells). Red crosses indicate outliers. Boxplots indicate the median and the 25<sup>th</sup>-to-75<sup>th</sup> percentiles. The whiskers extend to the most extreme data points. (d-i) Representative images of double immunohistochemistry using  $\alpha\text{-}\gamma\text{H2AX}$  (magenta) and  $\alpha\text{-}$

EGFP (green) in the trunk of *tg(fli:EGFP)* (**d-f**) and *tg(mbp:EGFP)* (**g-i**). (**j**) The number of  $\gamma$ H2AX foci in single nuclei of Schwann (day: n=47; night: n=49 cells) and endothelial cells (day: n=16; night: n=16 cells) during day and night. Values are represented as dot plots and means  $\pm$  SEM. Scale bar = 1  $\mu$ m.

## Supplementary Figure 4

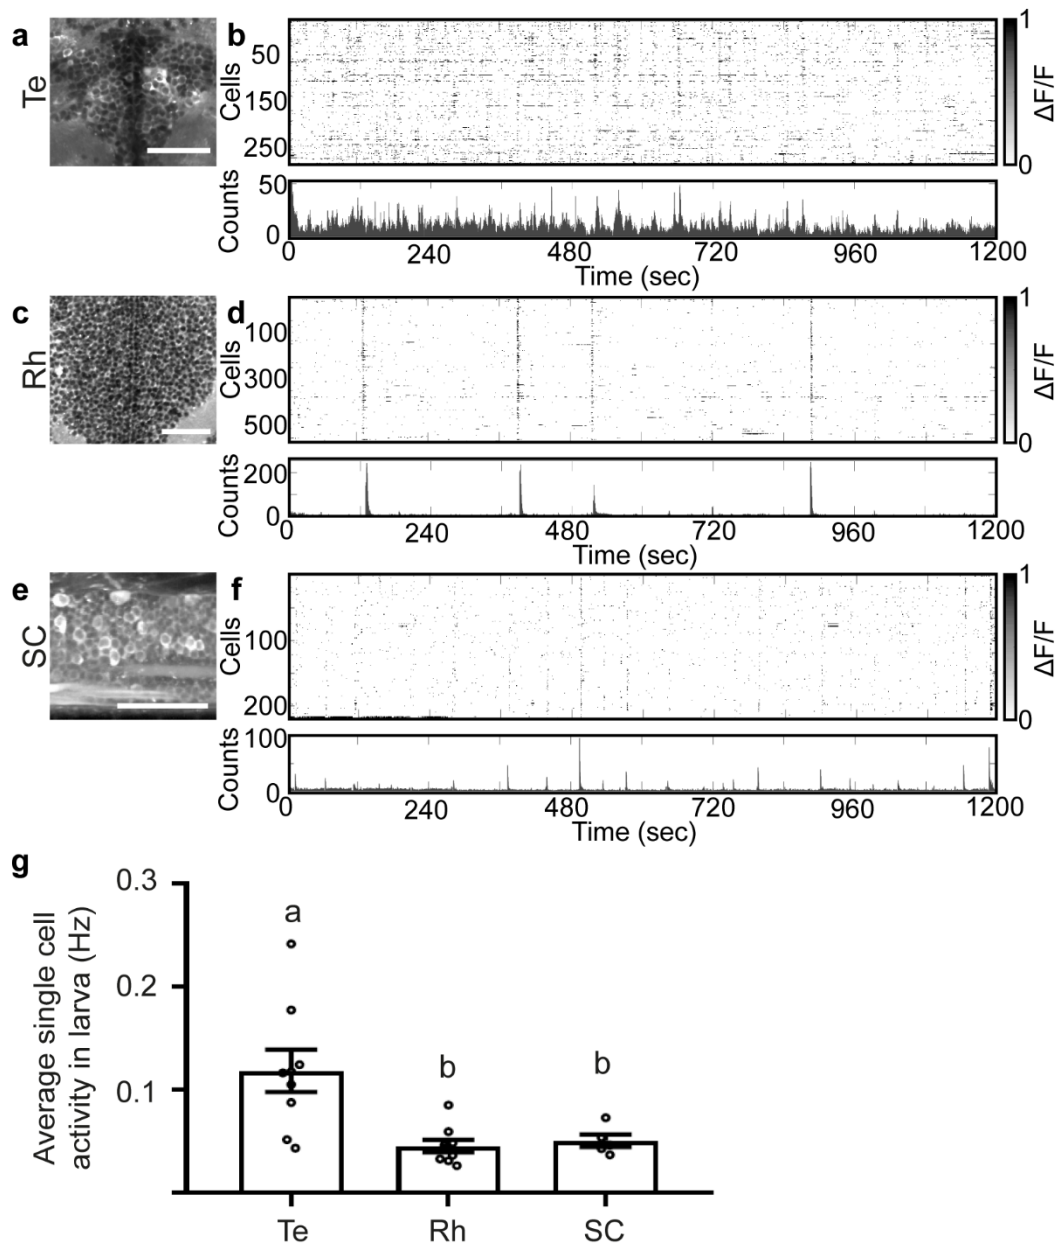

**Increased single cell activity in the telencephalon.** Representative GCaMP5 expression in neurons of the telencephalon (a, Te, n=9 larvae), rhombencephalon (c, Rh, n=9 larvae) and spinal cord (e, SC, n=5 larvae). Example of a raster plot of  $\Delta F/F$  in the Te (b), Rh (d), and SC (f). Grayscale:  $\Delta F/F$  amplitude. Bottom: histogram of the  $\text{Ca}^{2+}$  transients of all cells. (g) Increased spontaneous neuronal activity in the Te neurons.  $P=0.002$ ,  $F=8.33$ ,

degrees of freedom=2, determined by one-way ANOVA followed by a Tukey test. Letters indicate significant changes. Values are represented as dot plots and means  $\pm$  SEM. Scale bar = 50  $\mu$ m.
