# Supplementary material for: Sleep increases chromosome dynamics to enable reduction of accumulating DNA damage in single neurons
Source: PubMed Central journal article supplement (PMC6401120; doi:10.1038/s41467-019-08806-w), 2019-03-05
Supplement: 41467_2019_8806_MOESM2_ESM.pdf [file 41467_2019_8806_MOESM2_ESM.pdf]

## **Description of Additional Supplementary Files**

File Name: Supplementary Movie 1

Description: Imaging and analysis of chromosome dynamics in the brain of live zebrafish larvae

File Name: Supplementary Movie 2

Description: Imaging of telomere and centromere dynamics in single spinal cord neuron of live zebrafish larvae

File Name: Supplementary Movie 3

Description: Representative imaging of chromosome dynamics in single telencephalic neuron of live zebrafish larvae during the day.

File Name: Supplementary Movie 4

Description: Representative imaging of chromosome dynamics in single telencephalic neuron of live zebrafish larvae during the night.
